# Supplementary material for: A 1,1′-vinylene-fused indacenodithiophene-based low bandgap polymer for efficient polymer solar cells
Source: Royal Society of Chemistry journal article supplement (doi:10.1039/c6ta11240d), 2017-01-01

## Supporting information

### A 1,1'-vinylene-fused indacenodithiophene-based low bandgap polymer for efficient polymer solar cells

Qunping Fan,<sup>‡a</sup> Wenyan Su,<sup>‡a</sup> Xia Guo,<sup>\*a</sup> Xi Zhang,<sup>b</sup> Zhuo Xu,<sup>a</sup> Bing Guo,<sup>a</sup> Lang Jiang,<sup>b</sup> Maojie Zhang<sup>\*a</sup> and Yongfang Li<sup>\*ab</sup>

<sup>a</sup> State and Local Joint Engineering Laboratory for Novel Functional Polymeric Materials, Laboratory of Advanced Optoelectronic Materials, College of Chemistry, Chemical Engineering and Materials Science, Soochow University, Suzhou 215123, China.

\*E-mail: [mjzhang@suda.edu.cn](mailto:mjzhang@suda.edu.cn); [guoxia@suda.edu.cn](mailto:guoxia@suda.edu.cn); [liyongfang@suda.edu.cn](mailto:liyongfang@suda.edu.cn)

<sup>b</sup> Beijing National Laboratory for Molecular Sciences, CAS Key Laboratory of Organic Solids, Institute of Chemistry, Chinese Academy of Sciences, Beijing 100190, China.

\*E-mail: [liyf@iccas.ac.cn](mailto:liyf@iccas.ac.cn)

<sup>‡</sup> These authors contributed equally to this work.

### Experimental Section

*Measurements:* <sup>1</sup>H NMR and <sup>13</sup>C NMR spectra were measured in CDCl<sub>3</sub> on Bruker AV 400 MHz FT-NMR spectrometer. Mass spectra were obtained with a Shimadzu QP2010 spectrometer. Gel permeation chromatography (GPC) was performed on Agilent Technologies PL-GPC 220 High Temperature Chromatograph at 160 °C using 1,2,4-trichlorobenzene (TCB) as eluent and polystyrene as the standard. Elemental analysis

was performed on a flash EA1112 analyzer. TGA was performed on a Perkin-Elmer TGA-7. UV-vis absorption spectra were taken on an Agilent Technologies Cary Series UV-Vis-NIR Spectrophotometer, in which the molar concentration of the polymer in *o*-dichlorobenzene (*o*-DCB) was calculated according to the molecular weight of one D-A repeating unit. The electrochemical cyclic voltammetry (CV) was performed on a Zahner Ennium Electrochemical Workstation with glassy carbon disk, Pt wire, and Ag/Ag<sup>+</sup> electrode as working electrode, counter electrode, and reference electrode respectively in a 0.1 M tetrabutylammonium hexafluorophosphate (Bu<sub>4</sub>NPF<sub>6</sub>) acetonitrile solution. X-ray diffraction (XRD) measurement was performed using a Bruker D8 Advance Instrument at 40 kV voltage and 200 mA current with Cu K $\alpha$  radiation. The bottom-gate/bottom-contact organic field-effect transistors (OFET) were fabricated by evaporating gold source/drain electrodes. The polymer thin films were deposited onto bare SiO<sub>2</sub> by spin-coating method, and then annealing at 280 °C for 10 min.

The current density-voltage (*J-V*) characteristics were recorded with a Keithley 2450. The power conversion efficiencies of the resulting polymer solar cells were measured under 1 sun, AM 1.5G (air mass 1.5 global) (100 mW/cm<sup>2</sup>) using a SS-F5-3A (Enli Technology CO., Ltd.) solar simulator (AAA grade, 50 mm × 50 mm photo-beam size). 2×2 cm<sup>-2</sup> Monocrystalline silicon reference cell (SRC-00019) was purchased from Enli Technology CO., Ltd. The EQE was measured by Solar Cell Spectral Response Measurement System QE-R3011 (Enli Technology CO., Ltd.). The light intensity at each wavelength was calibrated with a standard single-crystal Si photovoltaic cell.

Atomic force microscopy (AFM) measurements were performed on a Dimension 3100 (Veeco) Atomic Force Microscope in the tapping mode with a 5  $\mu\text{m}$  scanner. Transmission electron microscopy (TEM) was performed using a Tecnai G2 F20 S-TWIN instrument at 200 kV accelerating voltage, in which the blend films were prepared using a processing technique, as following: first, the blend films were spin-cast on the PEDOT:PSS/ITO substrates; second, the resulting blend film/PEDOT:PSS/ITO substrates were submerged in deionized water to make these blend films float onto the air-water interface; finally, the floated blend films were taken up on unsupported 200 mesh copper grids for a TEM measurement.

**Fabrication of polymer solar cells.** Polymer solar cell devices with a conventional device structure of ITO/PEDOT:PSS/**PIDTV-ffBT**:PC<sub>71</sub>BM/PrC<sub>60</sub>MAIodide Salt/Al were fabricated under conditions as follows: patterned indium tin oxide (ITO)-coated glass with a sheet resistance of 10-15 ohm/square was cleaned by a surfactant scrub and then underwent a wet-cleaning process inside an ultrasonic bath, beginning with deionized water followed by acetone and isopropanol. After oxygen plasma cleaning for 10 min, a 30 nm thick poly(3,4-ethylenedioxythiophene):poly(styrenesulfonate) (PEDOT:PSS) (Bayer Baytron 4083) anode buffer layer was spin-cast onto the ITO substrate and then dried by baking in an oven at 150 °C for 15 min. The active layer was then deposited on top of the PEDOT:PSS layer by spin-coating from a 25 mg/mL *o*-DCB solution of **PIDTV-ffBT**:PC<sub>71</sub>BM. In the case of the devices using a processing additive, 1,8-diiodooctane (0-2% by volume) was added to the solutions before use. The thickness of the active layer was controlled by changing the spin speed during the spin-coating

process and measured on a KLA Tencor D-100 profilometer. The methanol solution of PrC<sub>60</sub>MAIodide Salt at a concentration of 0.5 mg/mL was deposited on the active layer at 3000 rpm for 30 s. Finally, 80 nm Al layer were successively deposited in vacuum onto the active layer at a pressure of ca.  $4 \times 10^{-4}$  Pa. The overlapping area between the cathode and anode defined a pixel size of 0.04 cm<sup>2</sup>. Except for the deposition of the PEDOT:PSS layers, all the fabrication processes were carried out inside a controlled atmosphere of nitrogen drybox containing less than 5 ppm oxygen and moisture.

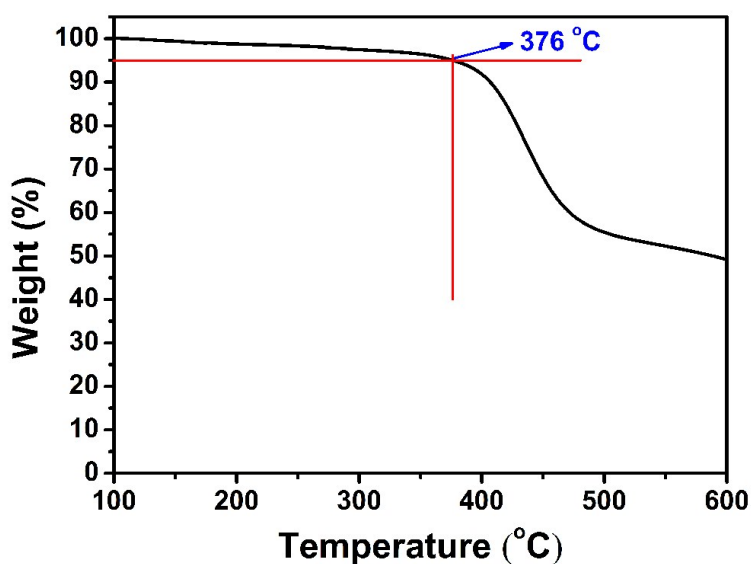

**Fig. S1** TGA curve of **PIDTV-ffBT** at a scan rate of 10 °C/min under nitrogen atmosphere.

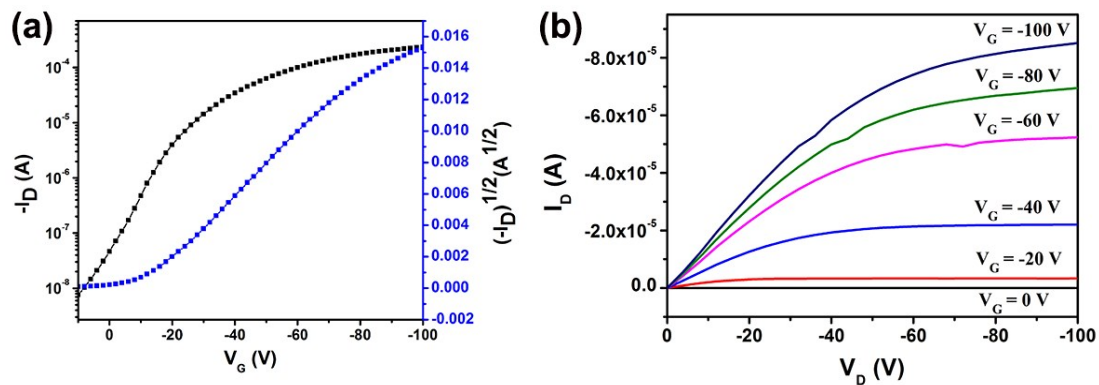

**Fig. S2** Transfer (a) and output (b) characteristics of the **PIDTV-ffBT**-based OFETs devices.

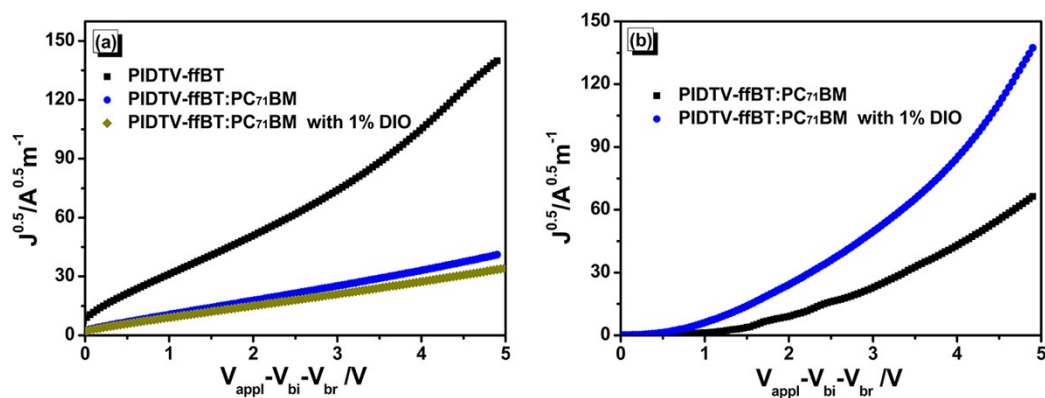

**Fig. S3** The  $J$ - $V$  curves of (a) the hole-only devices (b) the electron-only devices according to the SCLC model for pure **PIDTV-ffBT** film and **PIDTV-ffBT:PC<sub>71</sub>BM** blend films with different processed conditions.

**Table S1** Charge mobilities of the device active layers measured by SCLC method.

|                 | hole-only devices     |           | electron-only devices |           |
|-----------------|-----------------------|-----------|-----------------------|-----------|
|                 | mobilities            | thickness | mobilities            | thickness |
|                 | (cm <sup>2</sup> /Vs) | (nm)      | (cm <sup>2</sup> /Vs) | (nm)      |
| polymer         | $5.04 \times 10^{-3}$ | 220       |                       |           |
| blends          | $1.81 \times 10^{-4}$ | 200       | $2.16 \times 10^{-4}$ | 170       |
| blends + 1% DIO | $4.13 \times 10^{-4}$ | 260       | $15.7 \times 10^{-4}$ | 200       |

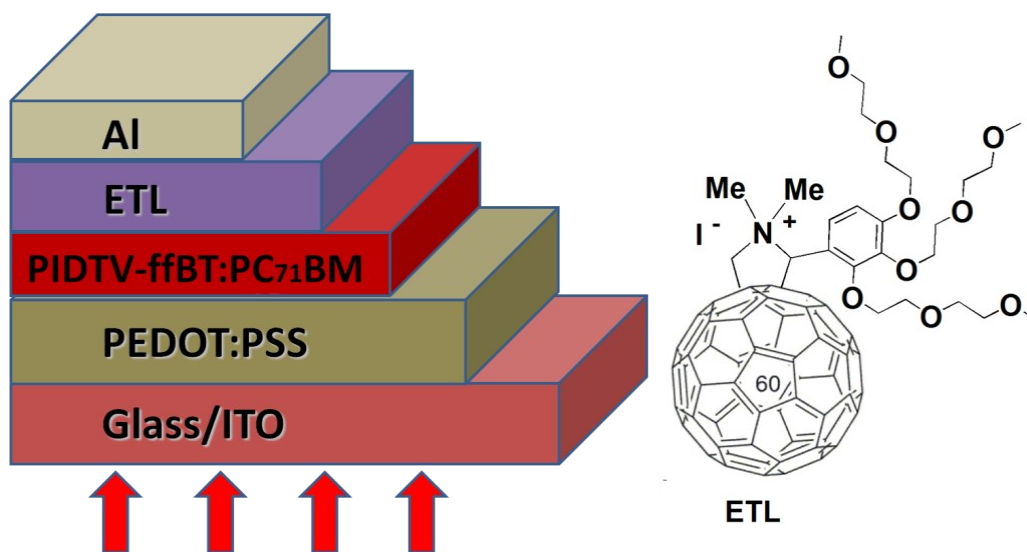

Fig. S4 Device structure of the PSCs and molecular formula of ETL in this study.

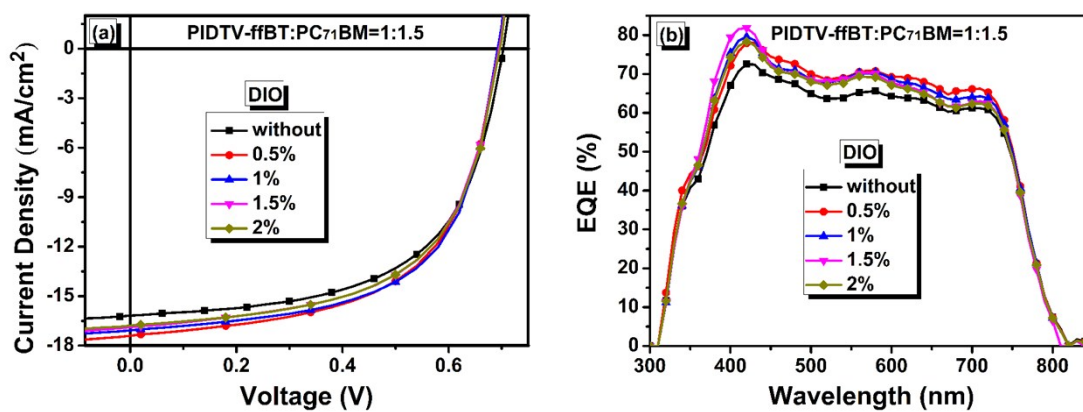

Fig. S5 (a) The  $J$ - $V$  curves and (b) EQE curves of the PSCs based on **PIDTV-ffBT:PC<sub>71</sub>BM** (1:1.5, w/w) with different DIO additive contents under the AM 1.5G illumination (100 mW cm<sup>-2</sup>).

**Table S2** Photovoltaic performance parameters of the **PIDTV-ffBT:PC<sub>71</sub>BM** (1:1.5, w/w)-based PSCs with different DIO additive contents under the AM 1.5G illumination (100 mW cm<sup>-2</sup>).

| DIO   | $V_{oc}$      | $J_{sc}$               | Calculated $J_{sc}$ <sup>a)</sup> | $FF$     | $PCE_{max}$ |
|-------|---------------|------------------------|-----------------------------------|----------|-------------|
| [v/v] | [V]           | [mA cm <sup>-2</sup> ] | [mA cm <sup>-2</sup> ]            | [%]      | [%]         |
| 0%    | 0.70          | 16.2                   | 15.8                              | 59       | 6.7         |
|       | (0.70 ± 0.01) | (15.7 ± 0.3)           |                                   | (57 ± 1) | (6.3 ± 0.2) |
| 0.5%  | 0.69          | 17.4                   | 16.8                              | 59       | 7.1         |
|       | (0.69 ± 0.01) | (16.9 ± 0.2)           |                                   | (57 ± 1) | (6.7 ± 0.2) |
| 1%    | 0.70          | 17.1                   | 16.7                              | 61       | 7.3         |
|       | (0.70 ± 0.01) | (16.7 ± 0.2)           |                                   | (58 ± 2) | (7.0 ± 0.2) |
| 1.5%  | 0.69          | 16.9                   | 16.4                              | 0.59     | 6.9         |
|       | (0.69 ± 0.01) | (16.3 ± 0.3)           |                                   | (57 ± 1) | (6.4 ± 0.3) |
| 2%    | 0.70          | 16.8                   | 16.3                              | 59       | 6.9         |
|       | (0.70 ± 0.01) | (16.3 ± 0.2)           |                                   | (57 ± 1) | (6.5 ± 0.2) |

<sup>a)</sup> Calculated by EQE. The average values and standard deviations of device parameters based on 15 devices are shown in brackets.

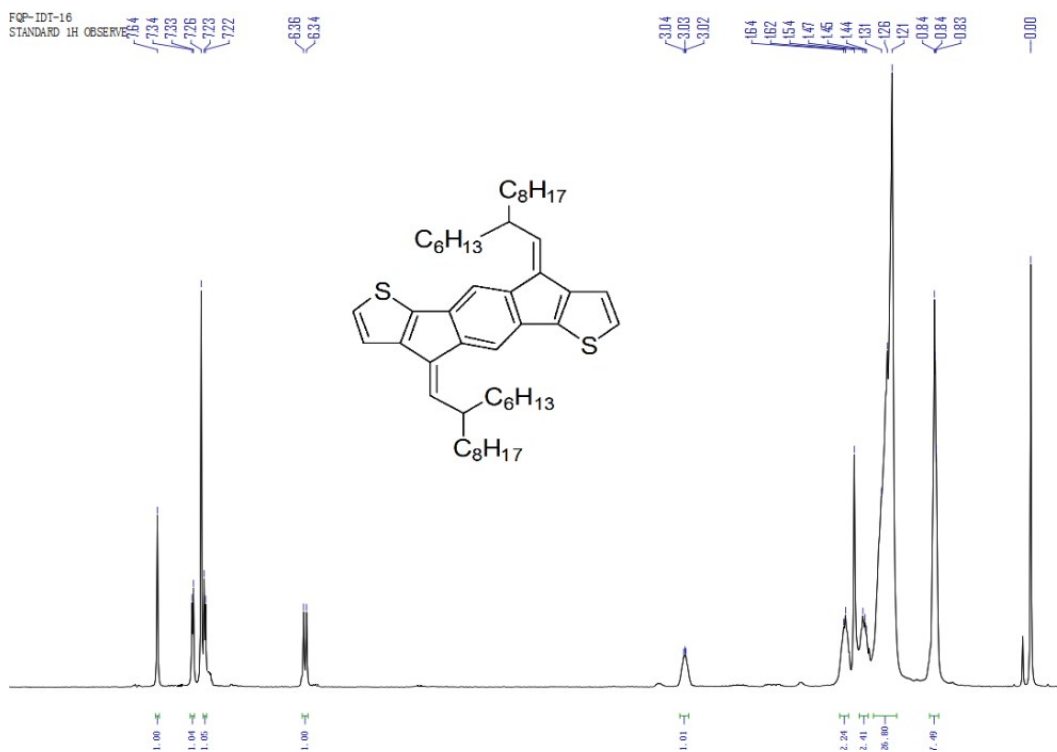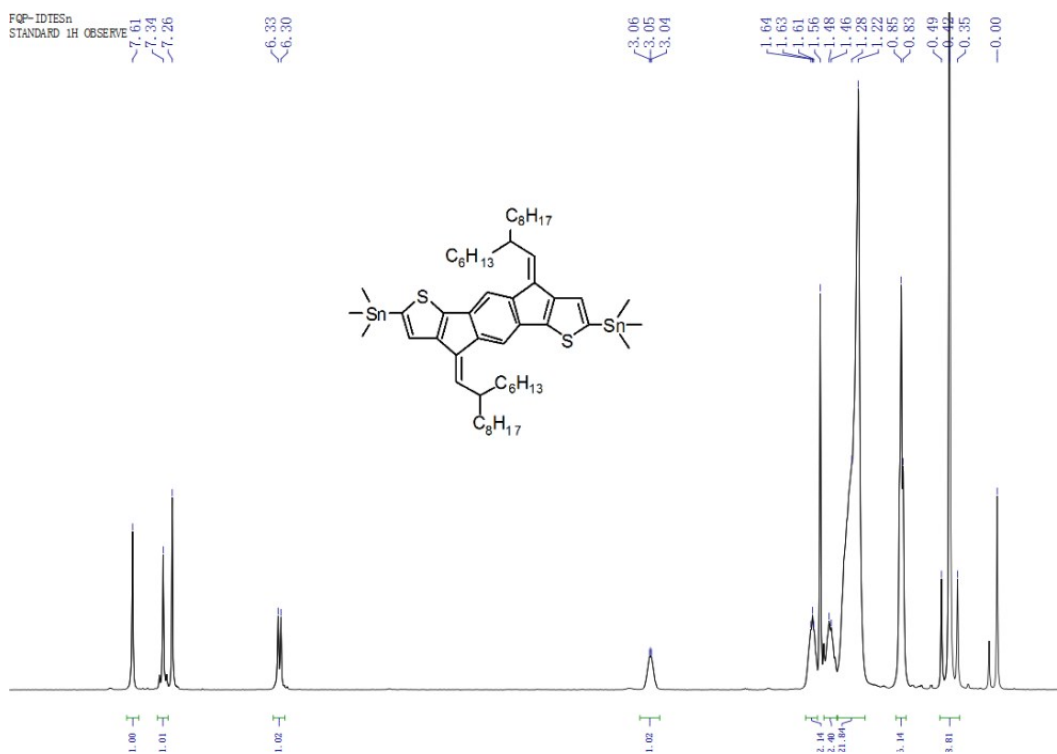



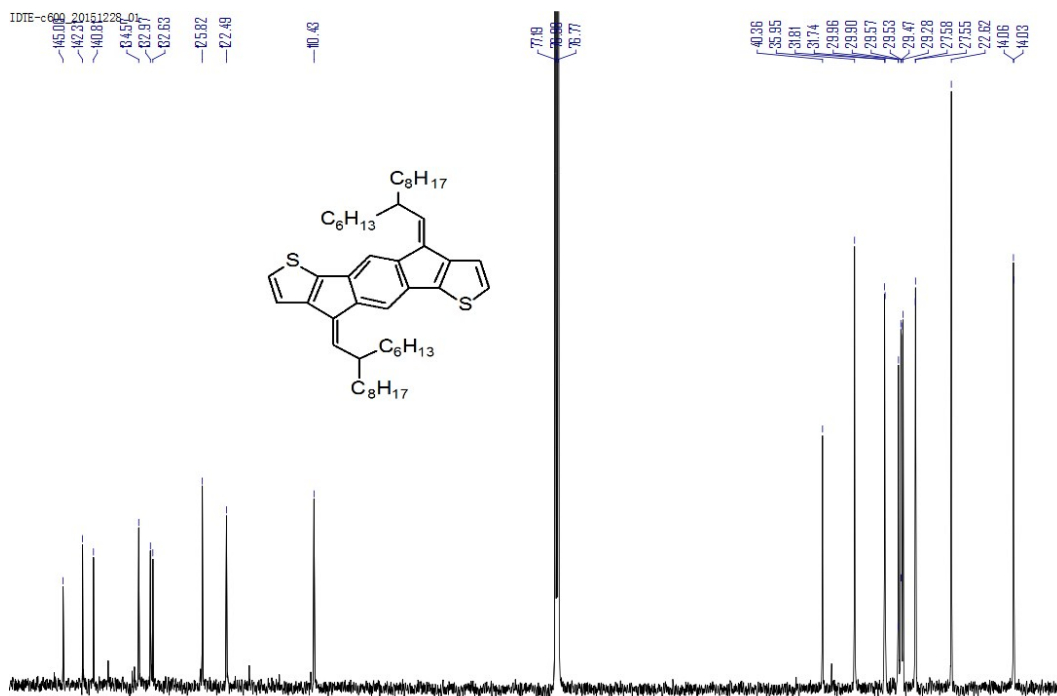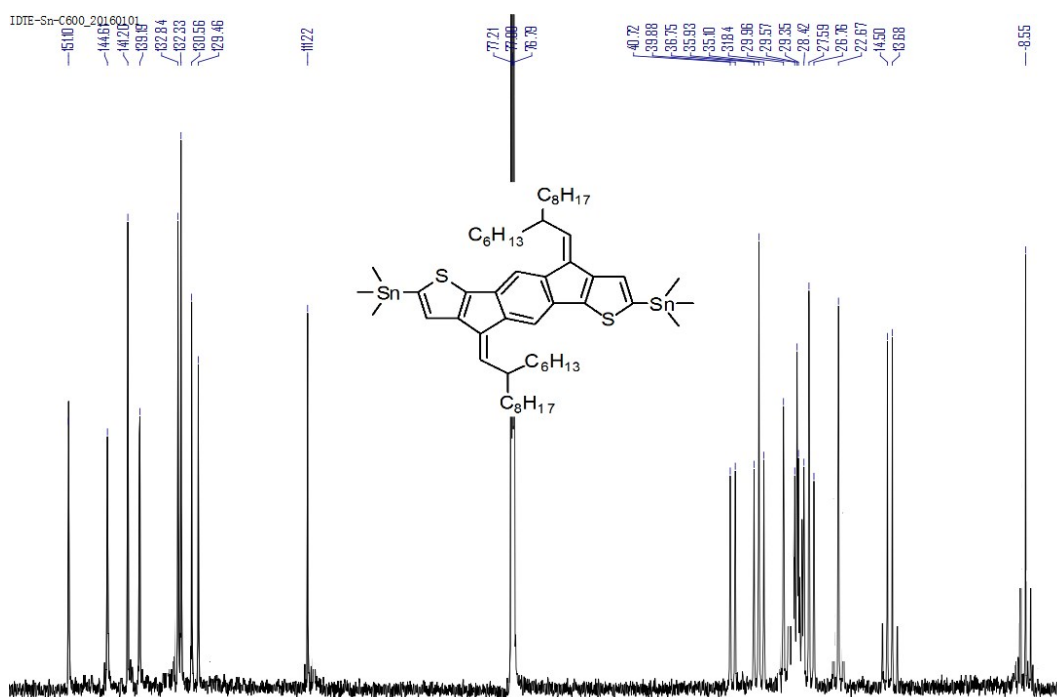

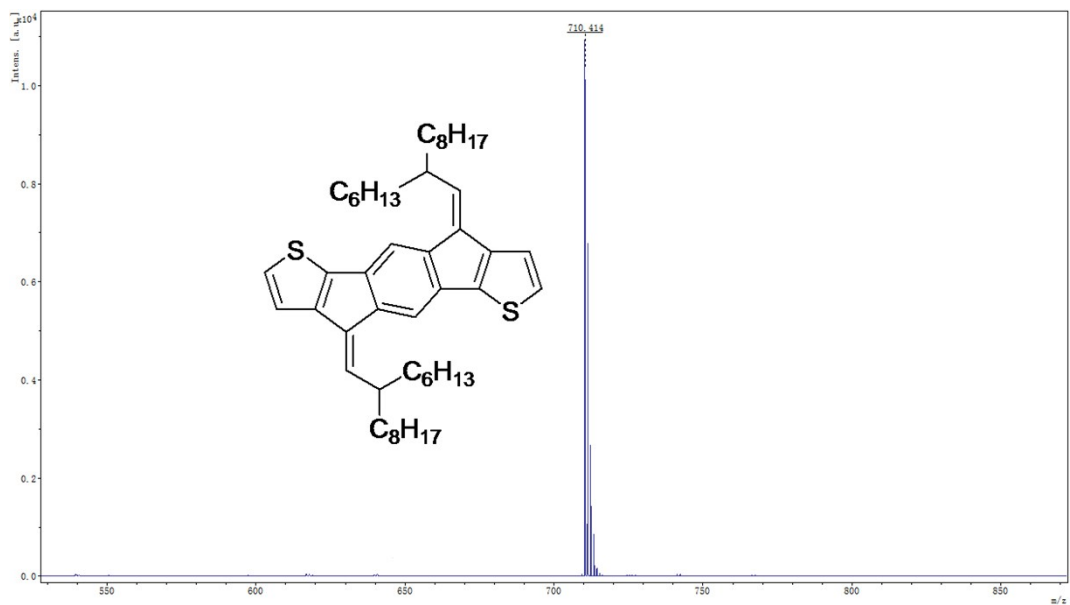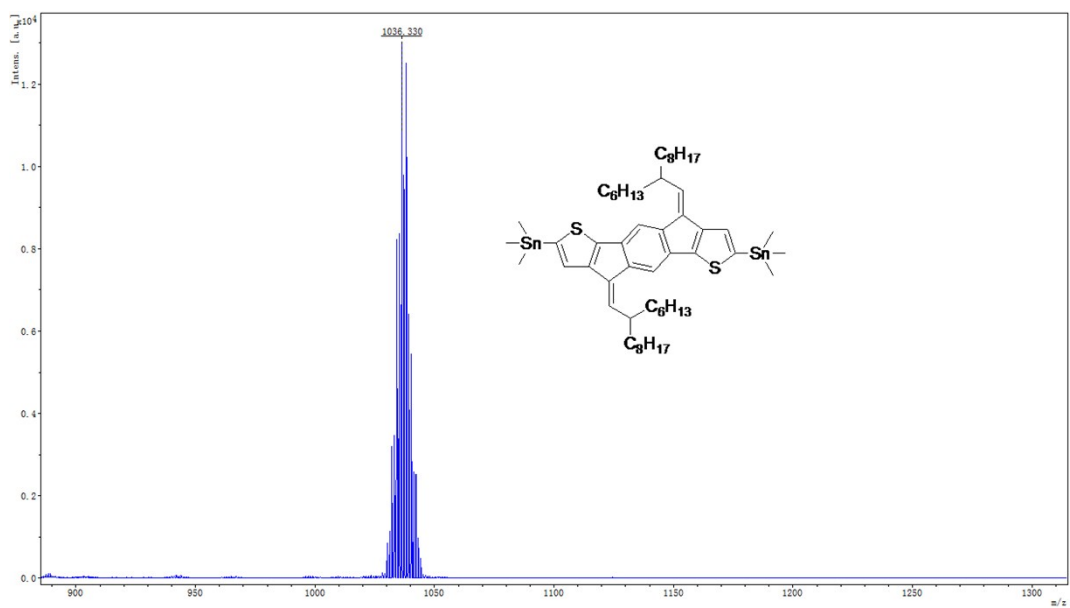

Supplement: c6ta11240d1.pdf [file c6ta11240d1.pdf]
